# Supplementary material for: The crystal chemistry of plutonium(iv) borophosphate
Source: Royal Society of Chemistry journal article supplement (doi:10.1039/d3dt00747b), 2023-01-01
Supplement: d3dt00747b1.pdf [file d3dt00747b1.pdf]

## *Supporting Information*

### **The Crystal Chemistry of Plutonium(IV) Borophosphate**

*Ginger E. Sigmon, Nicole A. DiBlasi, † Amy E. Hixon\**

Department of Civil & Environmental Engineering & Earth Sciences, University of Notre Dame, Notre Dame, IN, 46556 USA

<sup>†</sup>Present address: Actinide Analytical Chemistry, Los Alamos National Laboratory, Los Alamos, NM 87545 USA

\*Corresponding author. E-mail: ahixon@nd.edu

#### **Table of Contents**

|                                                       |   |
|-------------------------------------------------------|---|
| Table S1: Crystal parameters and structure refinement | 2 |
| Table S2: Displacement parameters                     | 3 |
| Table S3: Anisotropic atomic displacement parameters  | 3 |
| Table S4: Selected interatomic distances              | 4 |
| Table S5: Bond valence calculations                   | 4 |
| Figure S1: Absorption spectrum                        | 5 |
| Figures S2: Electron microprobe spectrum              | 5 |
| References                                            | 6 |

**Table S1.** Crystal parameters, data collection and structure refinement details for  $\text{Pu}(\text{H}_2\text{O})_3[\text{B}_2(\text{OH})(\text{H}_2\text{O})(\text{PO}_4)_3]$ .

| <b>Crystal data</b>                                |                                                                                             |
|----------------------------------------------------|---------------------------------------------------------------------------------------------|
| Formula                                            | $\text{Pu}(\text{H}_2\text{O})_3[\text{B}_2(\text{OH})(\text{H}_2\text{O})(\text{PO}_4)_3]$ |
| Formula weight ( $\text{g mol}^{-1}$ )             | 628.53                                                                                      |
| Temperature (K)                                    | 273(2)                                                                                      |
| Cell setting                                       | Hexagonal                                                                                   |
| Space group                                        | $P3$ (No. 143)                                                                              |
| $a$ ( $\text{\AA}$ )                               | 7.8764(10)                                                                                  |
| $c$ ( $\text{\AA}$ )                               | 5.5355(7)                                                                                   |
| $V$ ( $\text{\AA}^3$ )                             | 297.40(8)                                                                                   |
| $Z$                                                | 1                                                                                           |
| Crystal size (mm)                                  | $0.020 \times 0.020 \times 0.025$                                                           |
| Crystal form                                       | blocky                                                                                      |
| <b>Data collection</b>                             |                                                                                             |
| Diffractometer                                     | Bruker Apex II Quazar,<br>CCD-detector                                                      |
| Radiation; $\lambda$                               | Mo $K_\alpha$ ; 0.71073                                                                     |
| Density (calculated, $\text{g/cm}^3$ )             | 3.509                                                                                       |
| Absorption coefficient, $\mu$ ( $\text{mm}^{-1}$ ) | 6.051                                                                                       |
| $F(000)$                                           | 285                                                                                         |
| Data range $\theta$ ( $^\circ$ ); $h, k, l$        | 2.99–29.15; $-10 < h < 10$ ,<br>$-10 < k < 10$ , $-7 < l < 7$                               |
| No. of measured reflections                        | 3813                                                                                        |
| <b>Refinement</b>                                  |                                                                                             |
| Refinement on                                      | Full-matrix least squares on $F^2$                                                          |
| $R_1, wR_2$                                        | 0.0181, 0.0446                                                                              |
| GOF (Goodness of fit)                              | 1.085                                                                                       |
| Largest diff. peak and hole                        | 1.35 / -1.36                                                                                |

Note:  $R_1 = \sum ||F_{\text{obs}}| - |F_{\text{calc}}|| / \sum |F_{\text{obs}}|$ ;  $wR_2 = \{\sum [w(F_{\text{obs}}^2 - F_{\text{calc}}^2)^2] / \sum [w(F_{\text{obs}}^2)^2]\}^{1/2}$ ;

GOF =  $\{\sum [w(F_{\text{obs}}^2 - F_{\text{calc}}^2)] / (n - p)\}^{1/2}$  where  $n$  is a number of reflections and  $p$  is a number of refined parameters.

**Table S2.** Fractional site coordinates ( $xyz$ ), multiplicity (Mult.), site occupancy ( $q$ ), and equivalent displacement parameters ( $U_{\text{eq}}$ , Å) for  $\text{Pu}(\text{H}_2\text{O})_3[\text{B}_2(\text{OH})(\text{H}_2\text{O})(\text{PO}_4)_3]$ .

| Site | $x$        | $y$        | $z$         | Mult. | $q$ | $U_{\text{eq}}$ |
|------|------------|------------|-------------|-------|-----|-----------------|
| Pu   | 1          | 1          | 0.208881(2) | 1     | 1   | 0.00672(12)     |
| P    | 0.6954(3)  | 1.0047(3)  | 0.7083(3)   | 3     | 1   | 0.0081(4)       |
| B1   | 0.3333     | 0.6667     | 0.637(4)    | 1     | 1   | 0.015(3)        |
| B2   | 0.6667     | 0.3333     | 0.646(5)    | 1     | 1   | 0.020(4)        |
| O1   | 0.2615(10) | 0.4697(9)  | 0.698(2)    | 3     | 1   | 0.046(2)        |
| O2   | 0.8683(8)  | 0.4615(8)  | 0.7094(11)  | 3     | 1   | 0.0132(11)      |
| O3   | 0.3333     | 0.6667     | 0.366(2)    | 1     | 1   | 0.029(3)        |
| O4   | 0.6667     | 0.3333     | 0.377(3)    | 1     | 1   | 0.035(3)        |
| O5   | 0.8092(12) | 1.0392(11) | 0.9359(13)  | 3     | 1   | 0.0321(17)      |
| O6   | 0.0275(12) | 0.3602(10) | 0.2175(14)  | 3     | 1   | 0.0306(17)      |
| O7   | 0.8117(13) | 1.0447(11) | 0.4806(13)  | 3     | 1   | 0.0334(17)      |

Note:  $U_{\text{eq}}$  is defined as one third of the trace of the orthogonalized  $U_{ij}$  tensor.

**Table S3.** Anisotropic atomic displacement parameters for  $\text{Pu}(\text{H}_2\text{O})_3[\text{B}_2(\text{OH})(\text{H}_2\text{O})(\text{PO}_4)_3]$ .

| Site | $U_{11}$    | $U_{22}$    | $U_{33}$    | $U_{12}$   | $U_{13}$  | $U_{23}$  |
|------|-------------|-------------|-------------|------------|-----------|-----------|
| Pu   | 0.00784(14) | 0.00784(14) | 0.00446(17) | 0.00392(7) | 0         | 0         |
| P    | 0.0059(8)   | 0.0077(8)   | 0.0107(9)   | 0.0034(7)  | 0.0003(7) | 0.0001(7) |
| B1   | 0.013(6)    | 0.013(6)    | 0.020(9)    | 0.006(3)   | 0         | 0         |
| B2   | 0.013(6)    | 0.013(6)    | 0.035(12)   | 0.006(3)   | 0         | 0         |
| O1   | 0.011(3)    | 0.006(3)    | 0.122(8)    | 0.005(3)   | -0.002(4) | 0.003(4)  |
| O2   | 0.010(2)    | 0.007(3)    | 0.021(3)    | 0.003(2)   | -0.002(2) | -0.003(2) |
| O3   | 0.023(4)    | 0.023(4)    | 0.040(7)    | 0.0116(18) | 0         | 0         |
| O4   | 0.030(4)    | 0.030(4)    | 0.045(8)    | 0.015(2)   | 0         | 0         |
| O5   | 0.046(5)    | 0.034(4)    | 0.029(4)    | 0.029(4)   | -0.026(3) | -0.012(3) |
| O6   | 0.030(4)    | 0.018(3)    | 0.034(4)    | 0.004(3)   | -0.009(3) | -0.005(3) |
| O7   | 0.044(5)    | 0.040(4)    | 0.026(4)    | 0.028(4)   | 0.020(3)  | 0.008(3)  |

**Table S4.** Selected interatomic distances in  $\text{Pu}(\text{H}_2\text{O})_3[\text{B}_2(\text{OH})(\text{H}_2\text{O})(\text{PO}_4)_3]$ .

| Bond   |    | Bond length, Å      |
|--------|----|---------------------|
| Pu     | O5 | $2.258(6) \times 3$ |
|        | O6 | $2.735(7) \times 3$ |
|        | O7 | $2.260(7) \times 3$ |
| <Pu–O> |    | 2.42                |
| P      | O1 | 1.525(7)            |
|        | O2 | 1.567(6)            |
|        | O5 | 1.491(7)            |
|        | O7 | 1.496(7)            |
| <P–O>  |    | 1.52                |
| B1     | O1 | $1.402(9) \times 3$ |
|        | O3 | 1.50(3)             |
| B2     | O2 | $1.435(9) \times 3$ |
|        | O4 | 1.49(3)             |

**Table S5.** Bond valence calculations for  $\text{Pu}(\text{H}_2\text{O})_3[\text{B}_2(\text{OH})(\text{H}_2\text{O})(\text{PO}_4)_3]$ . Bond-valence sum calculations were performed using the bond-valence parameters for  $\text{Pu}^{4+}\text{--O}$  (Diwu et al., 2010) and  $\text{P}^{5+}\text{--O}$ ,  $\text{B}^{3+}\text{--O}$  (Brown and Altermatt, 1985). Bond-valence contribution of each cation has been weighted according to its site occupancy factor.

| Site  | O1                       | O2                       | O3    | O4    | O5                       | O6                       | O7                       | $V_c$ |
|-------|--------------------------|--------------------------|-------|-------|--------------------------|--------------------------|--------------------------|-------|
| Pu    |                          |                          |       |       | $0.610^{x3 \rightarrow}$ | $0.177^{x3 \rightarrow}$ | $0.607^{x3 \rightarrow}$ | 4.182 |
| P     | 1.275                    | 1.139                    |       |       | 1.398                    |                          | 1.379                    | 5.191 |
| B1    | $0.920^{x3 \rightarrow}$ |                          | 0.706 |       |                          |                          |                          | 3.466 |
| B2    |                          | $0.841^{x3 \rightarrow}$ |       | 0.725 |                          |                          |                          | 3.248 |
| $V_a$ | 2.195                    | 1.98                     | 0.706 | 0.725 | 2.008                    | 0.531                    | 1.986                    |       |

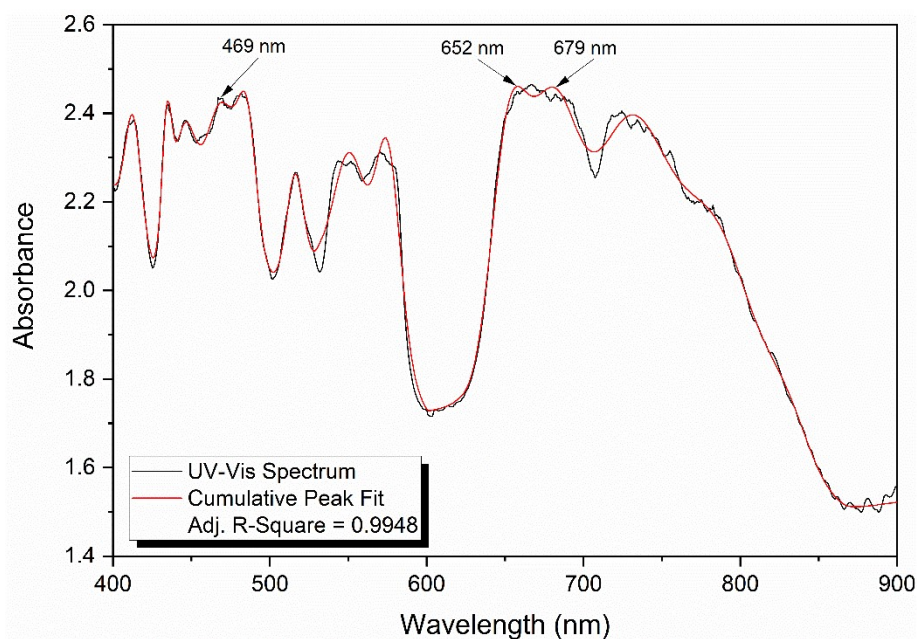

**Figure S1.** UV-vis-NIR absorption spectrum of plutonium borophosphate with a peak fit  $R^2 = 0.9948$ . Original data is shown in black and the cumulative peak fit is shown in red.

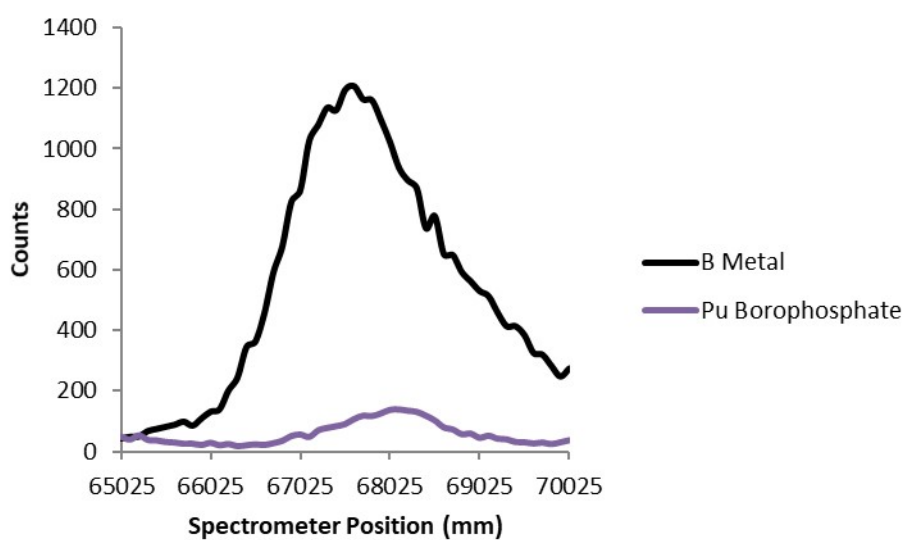

**Figure S2.** Comparison of electron microprobe signal for boron obtained from a B metal standard versus a crystal of plutonium borophosphate. The shift in peak maximum is attributed to the difference in chemical bonding of B in boron metal versus **1**.

## REFERENCES

Brown, I. D.; Altermatt, D. Bond-Valence Parameters Obtained from a Systematic Analysis of the Inorganic Crystal Structure Database. *Acta Crystallogr., Sect. B: Struct. Sci.* **1985**, *41* (4), 244-247.

Diwu, J.; Nelson, A.-G. D.; Wang, S.; Albrecht-Schmitt, T. E. Comparisons of Pu(IV) and Ce(IV) Diphosphonates. *Inorg. Chem.* **2010**, *49* (7), 3337-3342.
